# Supplementary material
Source: PubMed Central journal article supplement (PMC4713362)
Supplement: NIHMS740711-supplement-01.pdf [file NIHMS740711-supplement-01.pdf]

## Supporting information

**Table S1. Bacterial species observed between health and periodontitis subjects by Human Oral Microbe Identification Microarray (HOMIM)**

**Table S2. Microorganisms significantly correlated with periodontal disease**

**Figure S1. IL-6 production from HPBMs after stimulation with different concentrations of LPS, Pam3, iE-DAP and MDP.**

HPBMs were stimulated with different concentration of LPS, Pam<sub>3</sub>CSK<sub>4</sub>, ie-DAP, MDP and IL-6 production of culture supernatants were detected at 12h after stimulation. Data are shown as mean  $\pm$  SD of triplicate samples from one representative of two independent experiments. Asterisks indicate statistically significant to negative control ( $P < 0.05$ ) as determined by One-way ANOVA with Bonferroni post-test analysis.

**Figure S2. IL-6 production from BMDMs after stimulation with different concentrations of LPS, Pam3, iE-DAP and MDP.**

BMDMs from WT mice were stimulated with different concentration of LPS, Pam<sub>3</sub>CSK<sub>4</sub>, ie-DAP, MDP and IL-6 production of culture supernatants were detected at 12h after stimulation. Data are shown as mean  $\pm$  SD of triplicate samples from one representative of two independent experiments. Asterisks indicate statistically significant to negative control ( $P < 0.05$ ) as determined by One-way ANOVA with Bonferroni post-test analysis.

**Figure S3. IL-6 production from wild-type (WT) and knock-out (KO) mice Bone marrow-derived macrophages (BMDMs) after exposure to periodontal bacteria**

BMDMs from MyD88 and different TLRs KO mice were stimulated with *C. concisus*, *C. rectus* and *S. infelix* bacterial species that can induce robust IL-6 production to WT BMDMs at MOI 1:1. 50 ng/ml E. coli LPS were used as positive control for stimulation. Culture supernatants were also collected for IL-6 detection at 12h after stimulation. Data are shown as mean  $\pm$  SD of triplicate samples from one representative of three independent experiments. Asterisks indicate statistically significant to culture medium negative control ( $P < 0.05$ ) as determined by One-way ANOVA with Bonferroni post-test analysis.
